# Supplementary material
Source: HighWire-hosted journal article supplement (http://www.ajnr.org/highwire/filestream/79588/field_highwire_adjunct_files/0/20-00623.pdf)
Supplement: 20-00623.pdf [file 20-00623.pdf]

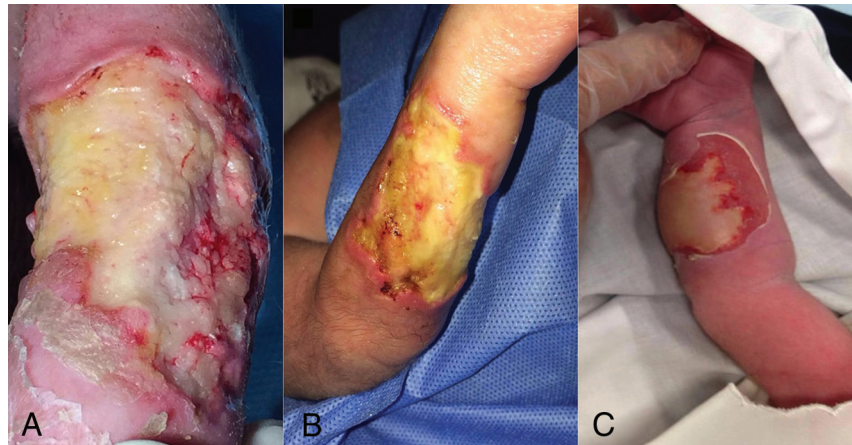

**ON-LINE FIG 1.** Sequential photographs of the right forearm of patient 1 obtained at birth (A) and 2 (B) and 4 weeks (C) after birth depicting progressive healing of the extensive cutaneous skin ulcer.

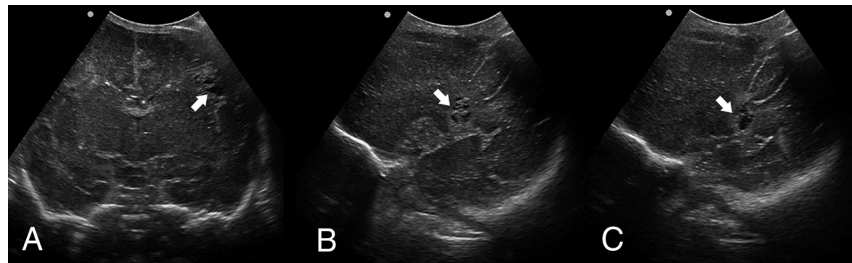

**ON-LINE FIG 2.** Cerebral sonography of patient 3 on day 1. Coronal (A) and parasagittal (B and C) ultrasonograms depict a focal, irregular area of hypoechoogenicity in the subcortical white matter of the right parietal region (*arrow*) compatible with a cavitation in the context of a chronic, prenatal ischemic lesion in the ipsilateral MCA territory.

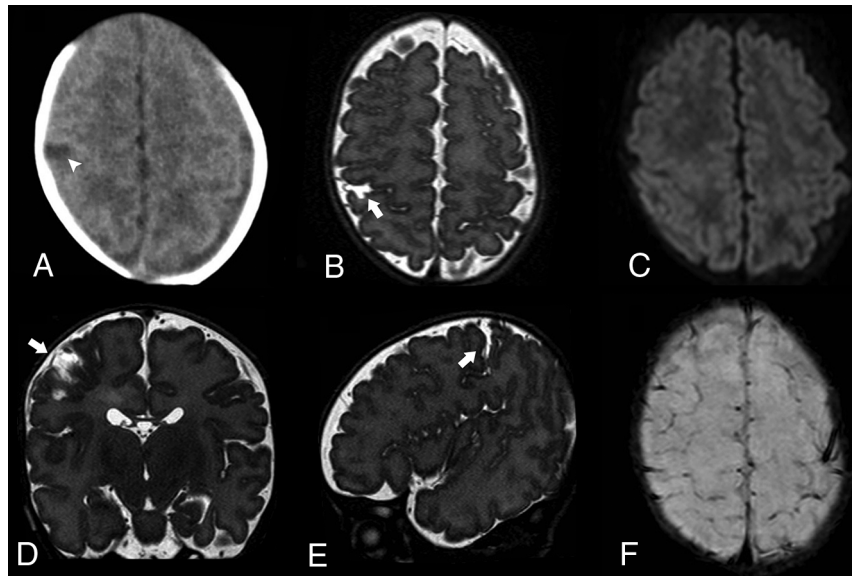

**ON-LINE FIG 3.** Neuroimaging studies of patient 4. Unenhanced head CT scan (A) performed at 36 gestational weeks of corrected age reveals a focal area of corticosubcortical hypoattenuation in the right parietal region (*arrowhead*). Brain MR imaging obtained at term-equivalent age, including axial (B), coronal (D), and sagittal (E) 3D-driven equilibrium (DRIIVE) images confirmed a focal chronic ischemic stroke in the superficial territory of the ipsilateral MCA (*arrow*) causing focal enlargement of the adjacent CSF spaces. Note the absence of associated foci of restricted diffusion on DWI (C) or susceptibility artifacts related to hemosiderin deposits on SWI (F).

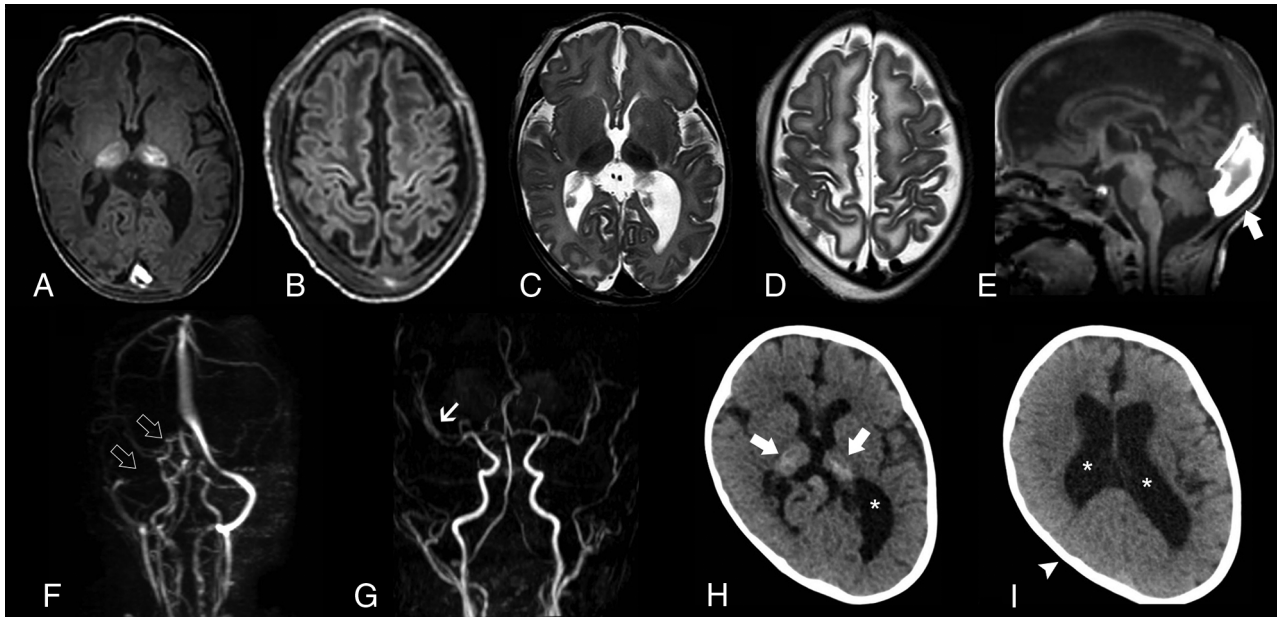

**ON-LINE FIG 4.** Longitudinal brain MR imaging findings of patient 1. Brain MR imaging performed at 1 month (A–D) and at 27 months of age (E–L), including axial (A) and sagittal (D, H) T1-weighted images, axial T2-weighted images (B, C, F, and G), and axial FLAIR (E) image reveal progressive atrophic changes over time within the initially affected bilateral cerebral arterial territories and the right thalamus, with ex vacuo dilation of the adjacent CSF spaces. These findings are accompanied by diffuse thinning of the corpus callosum (arrows). I. MRV, coronal view, performed at last follow-up demonstrates normalization of the caliber and flow-related signal of the torcula and right transverse sinus (open arrow). J. MRA reveals better representation of the right anterior cerebral artery flow-related signal, with persistent asymmetric MCA branches, less visible on the right (thin arrow). K. Axial 3D pseudocontinuous arterial spin-labeling map depicts reduced perfusion in the infarcted areas. Axial directionally encoded color fractional anisotropy (FA) map at the level of the basal ganglia (L) shows markedly reduced FA of the posterior limb of the right internal capsule (arrowhead).

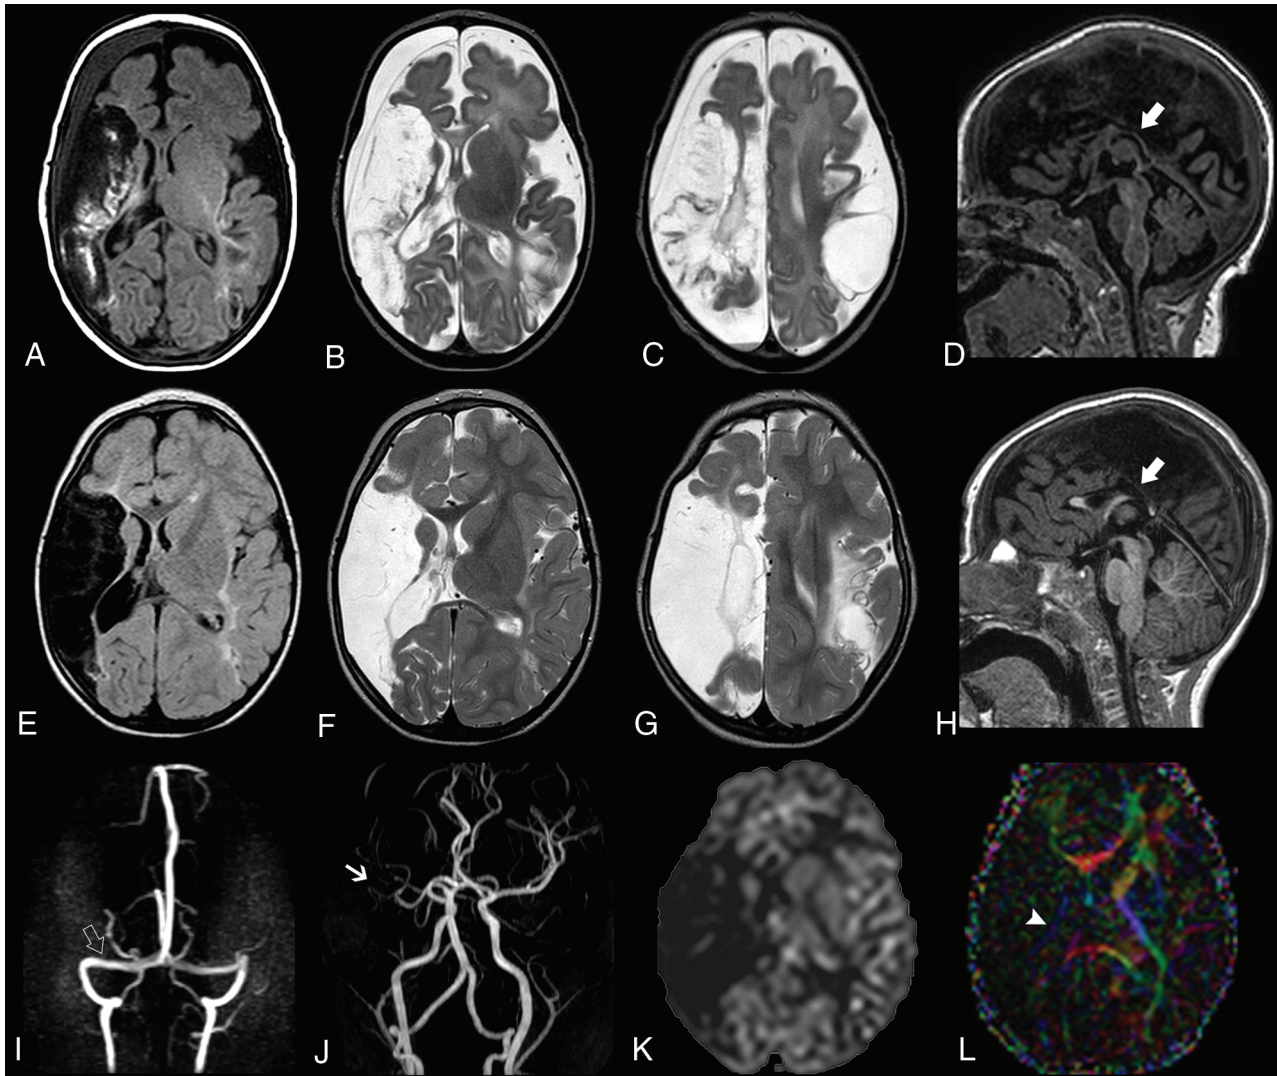

**ON-LINE FIG 5.** Follow-up neuroimaging of patient 2. Brain MR imaging performed on day 14, including axial (A and B) and sagittal (E) T1-weighted image and axial T2-weighted images (C and D) show stable appearance of the chronic hypoxic-ischemic encephalopathy signs, as well as reversal of the diffusion abnormalities within the cortical embolic ischemic infarcts in the right MCA territory, likely related to spontaneous recanalization of the distal MCA branches. There is also spontaneous T1 hyperintensity on the torcula, in keeping with dural sinus thrombosis (*arrow*). F. MRV, coronal view, confirms absence of flow-related signal in the torcula and right transverse sinus (*empty arrow*). G. MRA depicts persistent asymmetry of the MCA branches, less visible on the right (*small arrow*). Unenhanced head CT scan (H and I) obtained at 9.5 months shows atrophy and spontaneous hyperattenuation of the thalami (*arrows*), as well as mild to moderate ventricular enlargement (*asterisks*) and right positional plagiocephaly (*arrowhead*).

**On-line Table 1: Baseline clinical features and neurologic outcome**

| Patient No. | Sex | IUIGR | Prenatal Data              | Delivery    | GA (wks) | Apgar Scores (1/5) | BW, g (SDS) | Length, cm (SDS) | HC, cm (SDS) | Neurologic Presentation                                        | Associated Systemic Findings          | UC                               | FVM Classification                                    | Associated MVM                                      | Age at Last FU     | Motor Outcome        | Other Neurologic Problems                                                                       |
|-------------|-----|-------|----------------------------|-------------|----------|--------------------|-------------|------------------|--------------|----------------------------------------------------------------|---------------------------------------|----------------------------------|-------------------------------------------------------|-----------------------------------------------------|--------------------|----------------------|-------------------------------------------------------------------------------------------------|
|             |     |       |                            |             |          |                    |             |                  |              |                                                                |                                       |                                  |                                                       |                                                     |                    |                      |                                                                                                 |
| 1           | M   | No    | Threat of preterm delivery | Elective CS | 39       | 8/9                | 3280 (0.1)  | 51 (1)           | 34 (0.1)     | Clinic seizures, reduced movements in the R upper limb (day 1) | Skin ulcer                            | 2 turns around the neck at birth | High-grade (first-order stem vessels)                 | Accelerated villous maturation with hypoxic changes | 36 mo              | Tetraparesis (L > R) | Microcephaly, severe developmental delay, stereotypies, hyperactivity                           |
| 2           | M   | Yes   | Twin pregnancy (DD)        | Urgent CS   | 36       | 6/8                | 1895 (-2.3) | 44 (-1.9)        | 30.5 (-1.9)  | Apnea, clonic seizures (day 1)                                 | Transient myocardial ischemia (day 1) | False knots with torsion         | High-grade (amniochorial vessels)                     | Accelerated villous maturation with hypoxic changes | 9 mo (death 10 mo) | Tetraparesis         | Microcephaly, severe developmental delay, drug-resistant epilepsy, artificial enteral nutrition |
| 3           | M   | Yes   | Twin pregnancy (DD)        | Urgent CS   | 30       | 7/8                | 910 (-2.2)  | 36 (-1.5)        | 26 (-1.2)    | Incidental finding at US (day 1)                               | Severe NEC (5 days), RDS (day 1)      | Hypocoiled                       | High-grade (amniochorial and I-II order stem vessels) | Defective implantation with hypoxic changes         | NA (death 15 days) | NA                   | NA                                                                                              |
| 4           | M   | Yes   | Preeclampsia               | Urgent CS   | 30       | 5/7                | 930 (-2.2)  | 35 (-2)          | 27 (-0.6)    | Incidental finding at CT* (40 days)                            | RDS (day 1)                           | Hypercoiled                      | High-grade (amniochorial and I-II order stem vessels) | Defective implantation with hypoxic changes         | 5 yr               | Normal               | Normal development and cognitive function                                                       |
| 5           | M   | No    | PPROM                      | Urgent CS   | 36       | 6/8                | 2200 (-1.3) | 44 (-1.6)        | 32.5 (-0.1)  | Apnea, suspected early sepsis (4 days)                         | RDS (day 1)                           | 1 turn of bandolier at birth     | High-grade (amniochorial stem vessels)                | No                                                  | 6 mo               | L hemiparesis        | Moderate developmental delay                                                                    |

**Note:**—BW indicates body weight; CS, cesarean section; DD, dichorionic diamniotic; FU, follow-up; GA, gestational age; HC, head circumference; L, left; M, male; MVM, maternal vascular malperfusion; NA, not applicable; NEC, necrotizing enterocolitis of the neonate; PPROM, preterm premature rupture of membranes; R, right; RDS, respiratory distress syndrome; SDS, standard deviation scores; UC, umbilical cord; US, sonography; IUIGR, intrauterine growth restriction.  
 \* Performed for suspected choanal stenosis.

**On-line Table 2: Neuroimaging characteristics at diagnosis and follow-up**

|                                                    | Patient 1                                                      | Patient 2                                                                       | Patient 3 <sup>a</sup>                               | Patient 4           | Patient 5                             |
|----------------------------------------------------|----------------------------------------------------------------|---------------------------------------------------------------------------------|------------------------------------------------------|---------------------|---------------------------------------|
| Cranial sonography                                 | Diffuse WM hyperchogenicity, R > L                             | Ventriculomegaly, inhomogeneous WM hyperchogenicity                             | Subcortical WM irregular cavitation, L parietal lobe | Normal              | Hyperchoic R periventricular WM       |
| Brain MR imaging (n)                               | 6                                                              | 2                                                                               | 0                                                    | 1                   | 2                                     |
| Age at first MR imaging                            | 1 day                                                          | 1 day                                                                           | NA                                                   | 2 mo, 10 days       | 18 days                               |
| Imaging findings at diagnosis                      | Yes                                                            | Yes                                                                             | No                                                   | No                  | No                                    |
| Infarcts in multiple territories                   | MCA (R mixed, <sup>b</sup> L superficial), ACA R > L           | MCA (superficial, watershed) R > L                                              | MCA (superficial) L                                  | MCA (superficial) R | MCA (mixed <sup>b</sup> ) R           |
| Arterial territories                               | Acute, early, and late subacute                                | Acute and chronic                                                               | Chronic                                              | Chronic             | Chronic                               |
| Laterality                                         | Yes                                                            | Yes                                                                             | NA                                                   | No                  | Yes                                   |
| Stage                                              | Yes (R > L)                                                    | No                                                                              | NA                                                   | No                  | Yes                                   |
| Early corticobasal diaschisis                      | R subdural fluid collection, dural sinus congestion            | Hypoxic-ischemic lesions, dural sinus congestion and thrombosis                 | NA                                                   | No                  | No                                    |
| Early Wallerian degeneration                       | No signs of arteriopathy, reduced flow signal in R MCA + R ACA | No signs of arteriopathy, reduced flow signal in R MCA                          | NA                                                   | NA                  | NA                                    |
| Associated findings                                | Asymmetric CST (30 days and 2 yr, 5 mo)                        | Asymmetric CST (14 days)                                                        | NA                                                   | NA                  | Asymmetric CST (6 mo, 26 days)        |
| MRA at diagnosis                                   | 2 yr, 5 mo                                                     | 14 days                                                                         | NA                                                   | NA                  | 6 mo, 26 days                         |
| DTI                                                | Encephalomalacia, gliosis, and atrophy                         | Reversal of the diffusion abnormalities with minor subcortical residual changes | NA                                                   | NA                  | Encephalomalacia, gliosis and atrophy |
| Age at last MR imaging                             | No                                                             | No                                                                              | NA                                                   | NA                  | No                                    |
| Imaging findings at last FU                        | Yes                                                            | Yes                                                                             | NA                                                   | NA                  | Yes                                   |
| Infarct evolution                                  | Yes                                                            | No                                                                              | NA                                                   | NA                  | Yes                                   |
| New infarcts                                       | Normalization of dural sinus caliber and venous flow signal    | Total recanalization of the dural venous sinus thrombosis                       | NA                                                   | NA                  | NA                                    |
| Ipsilateral thalamic atrophy and/or signal changes | Partial improvement                                            | Stability                                                                       | NA                                                   | NA                  | Reduced flow signal in R MCA          |
| Ipsilateral CST Wallerian degeneration             |                                                                |                                                                                 |                                                      |                     |                                       |
| Associated findings                                |                                                                |                                                                                 |                                                      |                     |                                       |
| MRA at last FU                                     |                                                                |                                                                                 |                                                      |                     |                                       |

**Note:**—ACA indicates anterior cerebral artery; CST, corticospinal tract; FU, follow-up; L, left; NA, not available; R, right; MCA, middle cerebral artery.

<sup>a</sup> This preterm neonate died at 15 days of life.

<sup>b</sup> Refers to both superficial and deep territories.
